# Supplementary material for: Nanofiber scaffold for cathode of solid oxidefuel cell
Source: Royal Society of Chemistry journal article supplement (doi:10.1039/c0ee00358a), 2010-11-03
Supplement: c0ee00358a.pdf [file c0ee00358a.pdf]

## Nanofiber Scaffold for Cathode of Solid Oxide Fuel Cell

Mingjia Zhi,<sup>a,b</sup> Nicholas Mariani,<sup>b</sup> Randall Gemmen,<sup>a</sup> Kirk Gerdes<sup>a</sup> and Nianqiang Wu<sup>a,b,\*</sup>

<sup>a</sup> National Energy Technology Laboratory, US Department of Energy, 3610 Collins Ferry Road,  
Morgantown, WV 26507, USA

<sup>b</sup> Department of Mechanical and Aerospace Engineering, WVNano Initiative, West Virginia University,  
Morgantown, WV 26506-6106, USA

\* To whom correspondence should be addressed. TEL: (304)-293-3326, FAX: (304)-293-6689, E-Mail:  
nick.wu@mail.wvu.edu

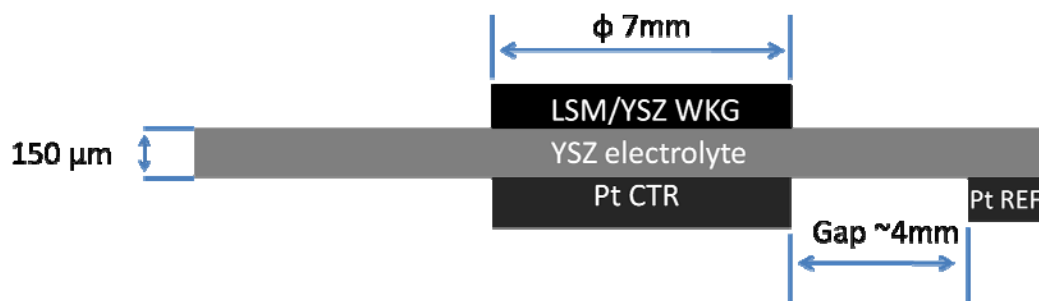

**Figure S1.** The configuration of the half cell used for electrochemical testing

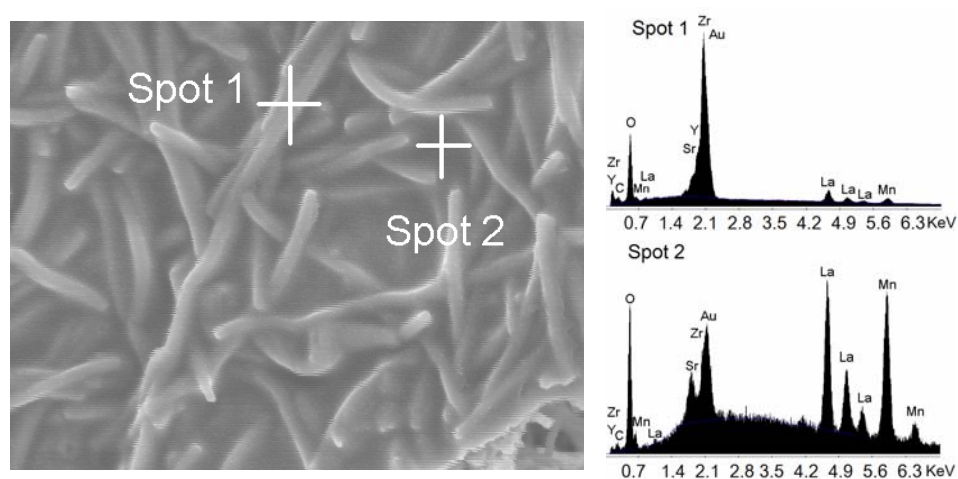

**Figure S2.** EDX analysis of the LSM50/YSZ cathode; Spot 1 is pointed on the nanofiber, and Spot 2 is obtained from the membrane between the nanofibers

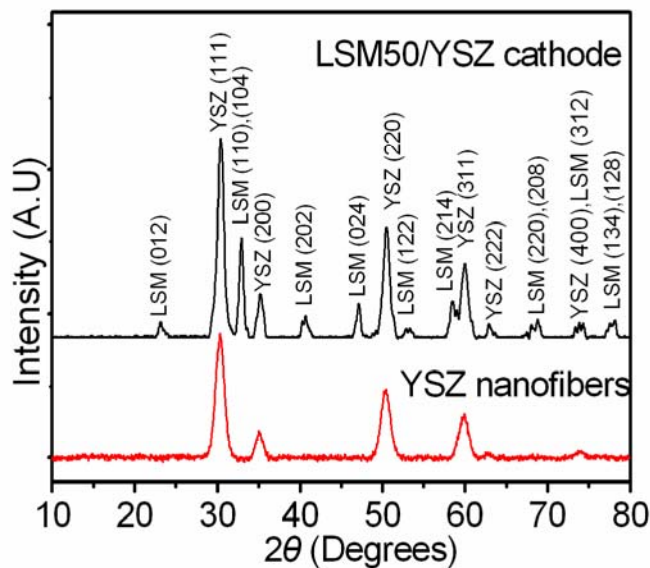

**Figure S3.** XRD patterns of the YSZ nanofiber scaffold and the LSM50/YSZ nanofiber composite cathode

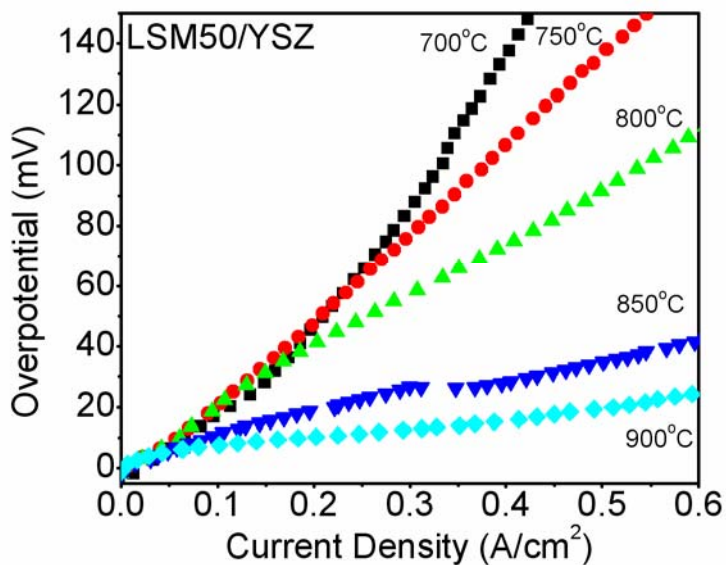

**Figure S4.** Polarization curves of the LSM50/YSZ cathode at different temperatures

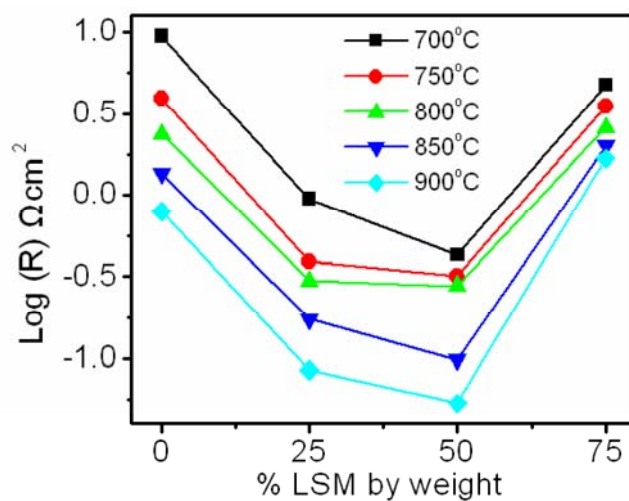

**Figure S5.** Polarization resistance as a function of the LSM content in the YSZ/LSM composite cathode at different temperatures
